# Supplementary material
Source: PubMed Central journal article supplement (PMC7311890)
Supplement: mmc1.pdf [file mmc1.pdf]

**Cell Metabolism, Volume 32**

## **Supplemental Information**

### **Omics-Driven Systems Interrogation of Metabolic**

### **Dysregulation in COVID-19 Pathogenesis**

**Jin-Wen Song, Sin Man Lam, Xing Fan, Wen-Jing Cao, Si-Yu Wang, He Tian, Gek Huey Chua, Chao Zhang, Fan-Ping Meng, Zhe Xu, Jun-Liang Fu, Lei Huang, Peng Xia, Tao Yang, Shaohua Zhang, Bowen Li, Tian-Jun Jiang, Raoxu Wang, Zehua Wang, Ming Shi, Ji-Yuan Zhang, Fu-Sheng Wang, and Guanghou Shui**

Figure S1

**A. T-lymphocyte counts**

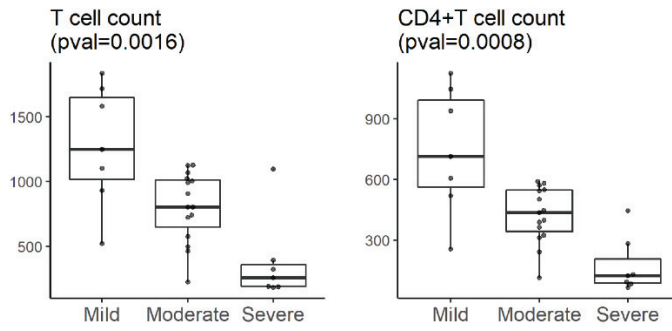

**B. Markers of Systemic Inflammation**

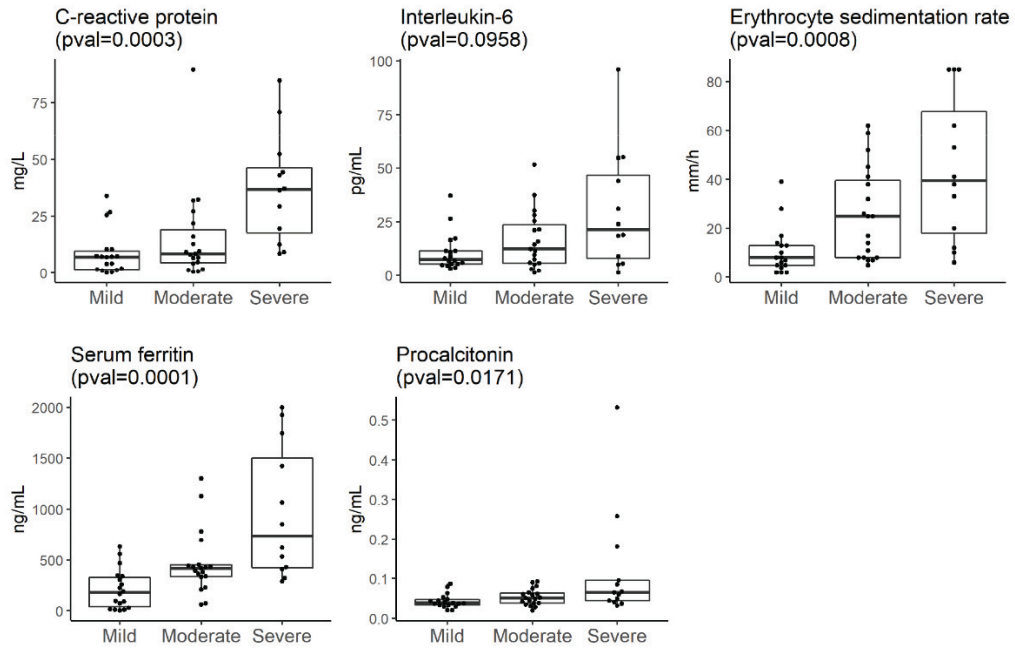

**C. Lipoproteins**

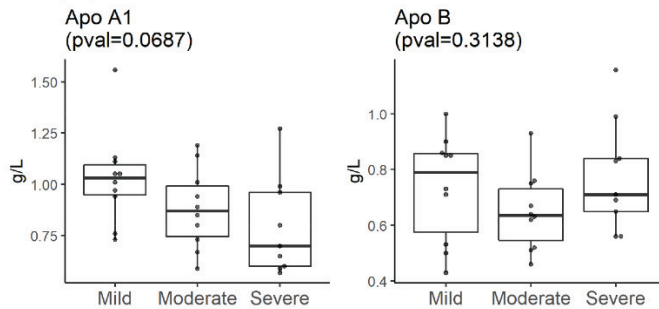

**Figure S1. Changes in clinical indices and laboratory findings across COVID-19 patients of different severity, Related to Table 1.** Boxplots of T-cell count (A), circulating lipoprotein content (B) and selected clinical indices relevant to systemic inflammation (C).

Figure S2

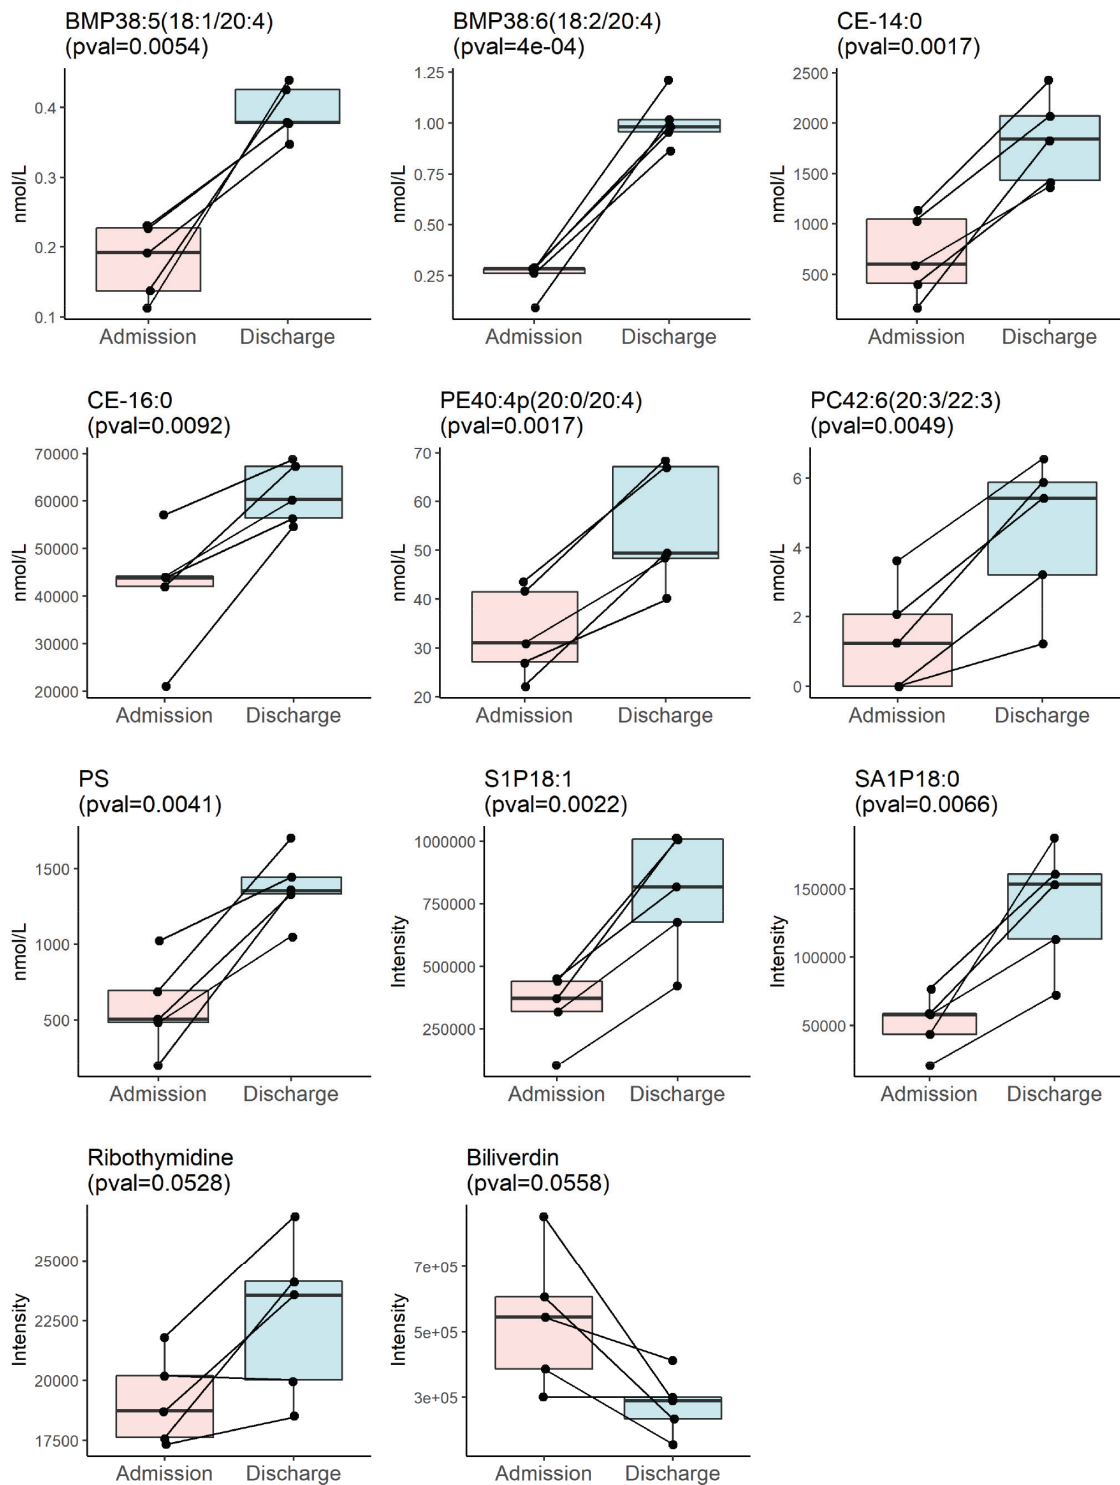

**Figure S2. Longitudinal changes in plasma lipids and metabolites in patients from hospital admission to discharge, Related to Figure 1.** Changes in metabolite levels in plasma samples collected at hospital admission and prior to discharge from five patients were shown in boxplots, with line segments connecting samples from the same patient. P value of paired t-test was indicated in each plot title.

Figure S3

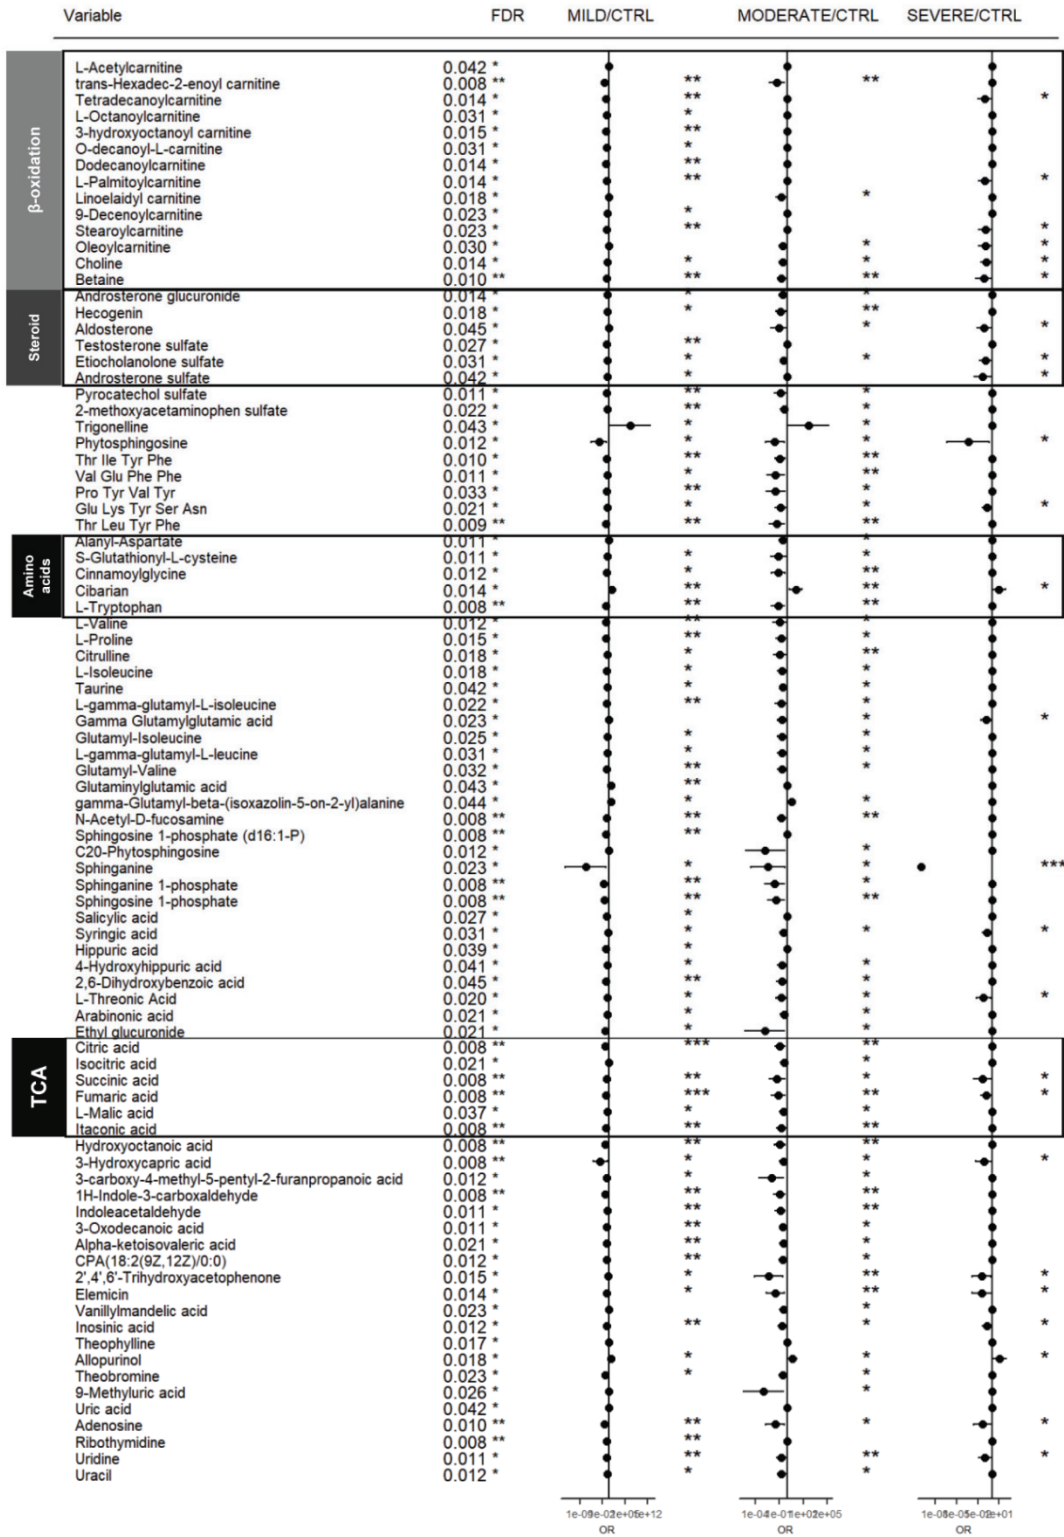

Figure S3. Plasma polar metabolites associated with disease severity, Related to Figure 1. Logistic regression model with covariates BMI, age and sex was built with each metabolite to search for significant variables that could predict disease severity of subjects (*i.e.* healthy control, mild, moderate, severe COVID-19). Only lipids with false discovery rate (fdr) < 0.05 were shortlisted and presented. Forest plots illustrate the magnitude of odds ratios with indicator of significance of the estimate in the model with \*\*\* representing  $p < 0.001$ , \*\* representing  $p < 0.01$  and \* representing  $p < 0.05$ . For non-significant species, the estimates were plotted as zero. TCA: tricarboxylic acid cycle. Metabolites implicated in β-oxidation, TCA cycle, as well as those belonging to the subclasses of steroids and amino acids were boxed up.

Figure S4

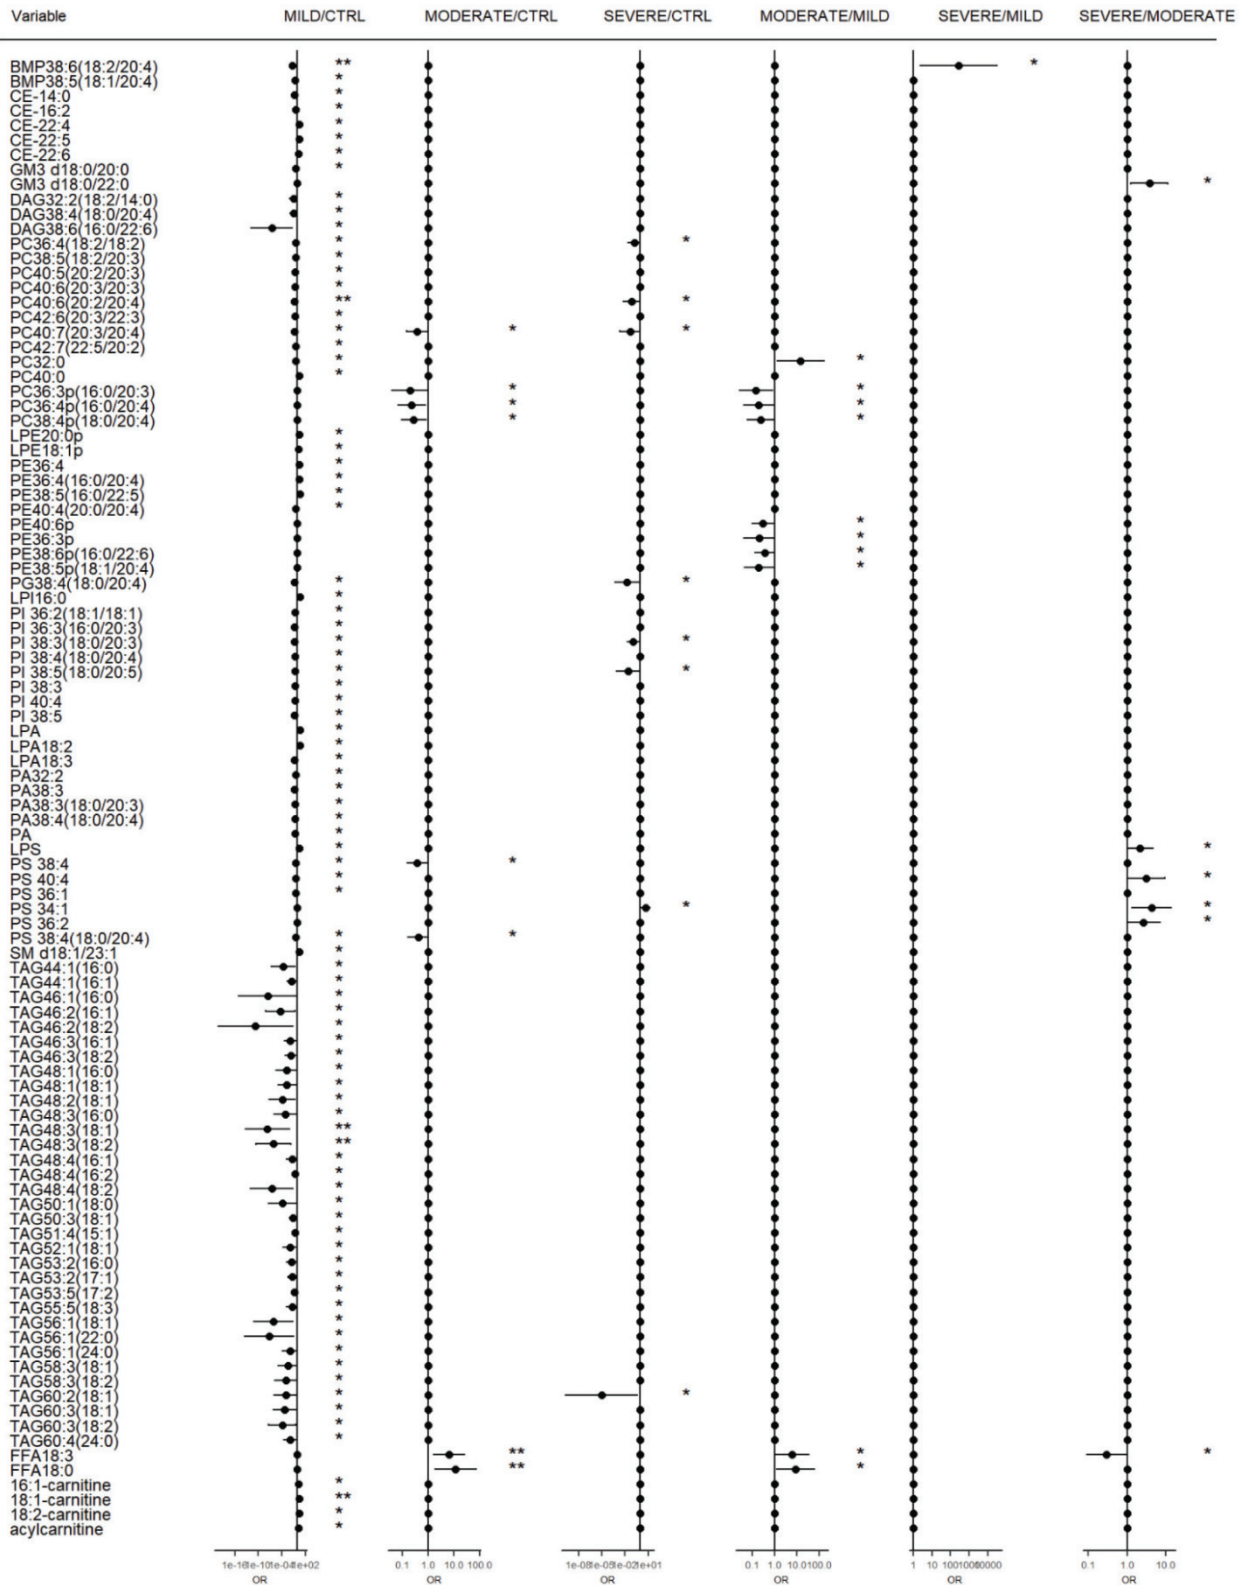

Figure S4. Plasma lipids associated with disease severity, Related to Figure 2. Logistic regression model with covariates age and sex was built with each lipid to search for significant variables that could predict disease severity of subjects (i.e. mild, moderate, severe COVID-19). The p-value of the variable estimate in the model was extracted and those  $p < 0.05$  were shortlisted and presented. Forest plot displays the magnitude of odds ratios with \*\*\* $p < 0.001$ , \*\* $p < 0.01$ , \* $p < 0.05$ ; For non-significant variables, estimates were plotted as zero.

**Figure S5**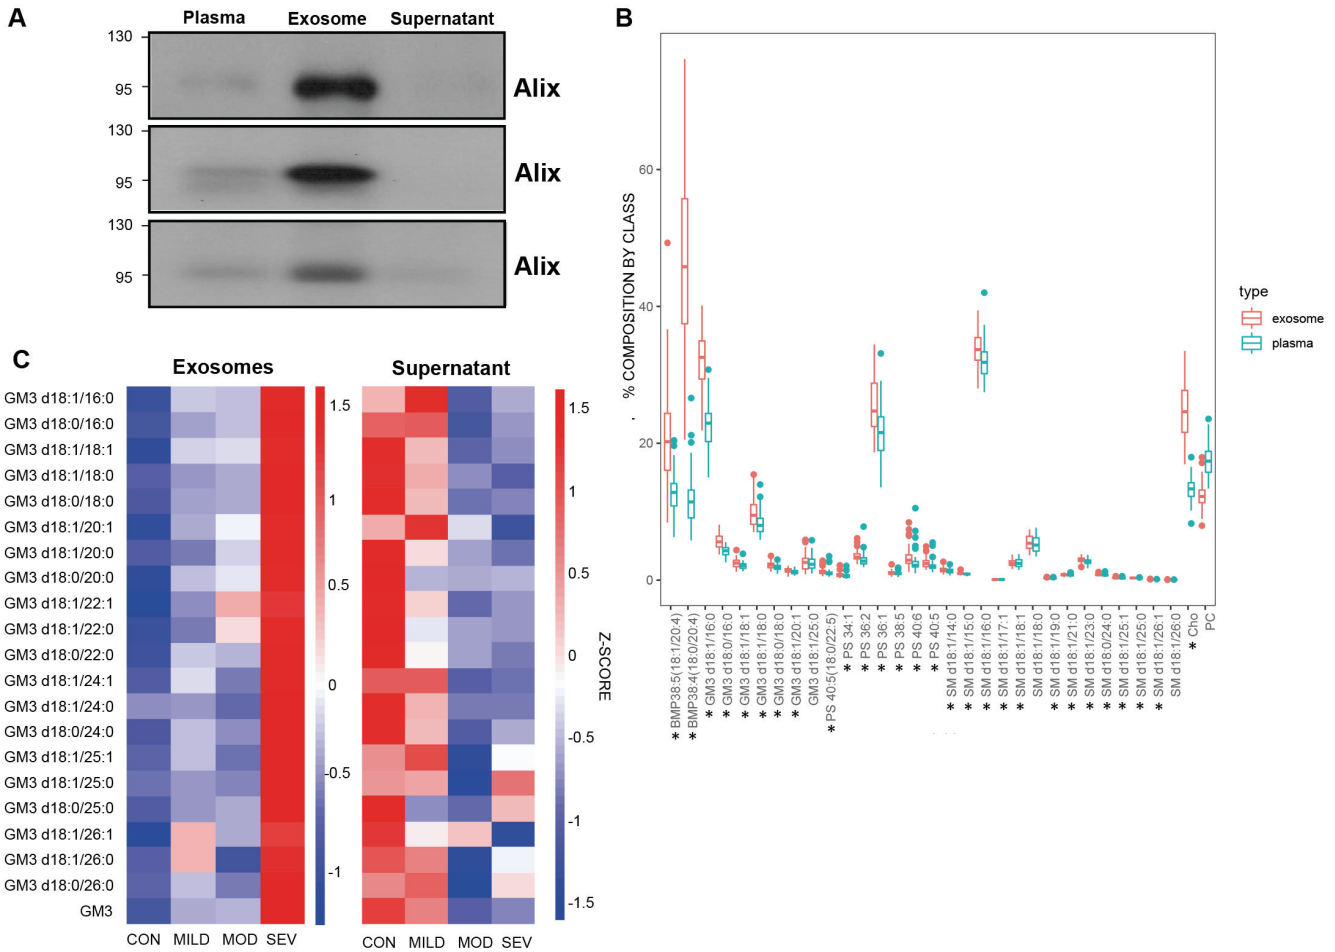**Figure S5. Protein markers and lipid composition of isolated exosomes, Related to Figure 5.**

- A.** Exosomes were isolated from 500  $\mu\text{L}$  of plasma using total exosome isolation kit (ThermoFisher Scientific, Invitrogen™ 4478360) according to the manufacturer's protocol. Isolated exosome pellet and supernatant (without exosomes) were collected separately. Proteins were extracted from plasma, isolated exosomes and supernatant samples using RIPA lysis buffer with protease inhibitor cocktail (Sigma). An equal amount of total protein (50  $\mu\text{g}$ ) was loaded for each type of samples for electrophoresis and subsequently blotted to nitrocellulose membrane. After blocking with 5% skimmed milk, the membrane was incubated with an anti-Alix primary antibody (Abcam 1/1000) and an HRP-conjugated anti-rabbit secondary antibody (Beijing Zhongshan Jinqiao Biotechnology Co., Ltd) successively. An ECL chemiluminescence system (ThermoFisher Scientific) was applied to develop membrane blots, followed by X-ray detection. Digital images were captured using a scanner and presented. Images from three experimental repeats were shown. Alix: ALG-2-interacting protein X
- B.** To investigate enrichment in specific lipid species in exosome relative to plasma, % composition of each lipid was calculated relative to its class sum total. T-test was performed to identify lipids with significant change in composition between exosome and plasma ( $n = 75$ ). Boxplots for selected lipids were illustrated to visualize compositional changes. Vertical axis was plotted on a logarithmic scale. Note: To visualize Cho enrichment in lipid membranes, % free Cho was calculated as sum of Cho + PC. \* indicate lipid with  $p < 0.05$  for exosome-specific enrichment. Cho: free cholesterol; BMP: bis(monoacylglycerol)phosphates; PS: phosphatidylserines; DAG: diacylglycerols; PC: phosphatidylcholines.
- C.** Plasma samples (100  $\mu\text{L}$  each) were pooled from four subjects from each of the four clinical categories (control, mild, moderate, severe) and exosomes were isolated using total exosome isolation kit. Both exosome pellets and supernatant samples were collected. Lipids were extracted from exosome and supernatant samples respectively, and the levels of GM3s (expressed in nmol/g total protein) present in exosomes and supernatant of control, mild, moderate and severe COVID-19 patients were illustrated in the heatmaps. CON: healthy controls; MILD: mild; MOD: moderate; SEV: severe COVID-19 patients. GM3: monosialodihexosyl gangliosides

**Table S1. Laboratory findings of hospitalized COVID-19 patients, Related to Table 1.**

Data are median (IQR). P values comparing mild, moderate and severe patients were computed using Kruskal-Wallis H test (leucocytes count, neutrophils count, D-dimer, alanine aminotransferase, aspartate aminotransferase, lactate dehydrogenase, interleukin-6, procalcitonin, erythrocyte sedimentation rate, serum ferritin) and One-way ANOVA (all other indices). COVID-19: coronavirus disease 2019.

|                                          | Normal Range | Total<br>n=50       | Mild<br>n=18        | Moderate<br>n=19    | Severe<br>n=13       | P value |
|------------------------------------------|--------------|---------------------|---------------------|---------------------|----------------------|---------|
| <b>Blood routine</b>                     |              |                     |                     |                     |                      |         |
| Leucocytes count, × 10 <sup>9</sup> /L   | 3.97-9.15    | 4.34 (3.61-5.43)    | 5.05 (3.99-5.83)    | 4.02 (3.36-4.59)    | 4.33 (3.53-5.40)     | 0.193   |
| Neutrophils count, × 10 <sup>9</sup> /L  | 2.00-7.00    | 2.74 (1.95-3.42)    | 2.86 (2.12-3.35)    | 2.26 (1.90-2.85)    | 3.27 (1.96-3.91)     | 0.186   |
| Lymphocytes count, × 10 <sup>9</sup> /L  | 0.80-4.00    | 1.31 (0.85-1.61)    | 1.55 (1.33-2.28)    | 1.30 (1.01-1.67)    | 0.77 (0.41-1.14)     | <0.0001 |
| Platelets count, × 10 <sup>9</sup> /L    | 85.0-303.0   | 168.5 (149.0-211.5) | 169.5 (151.0-214.8) | 167.0 (153.0-195.5) | 162.0 (131.0-234.0)  | 0.762   |
| Haemoglobin, g/L                         | 131.0-172.0  | 137.0 (129.3-149.5) | 140.5 (129.3-150.0) | 137.0 (133.0-149.5) | 135.0 (123.0-147.0)  | 0.477   |
| <b>Coagulation function</b>              |              |                     |                     |                     |                      |         |
| Activated partial thromboplastin time, s | 23.0-42.0    | 32.5 (29.5-36.0)    | 30.7 (28.6-34.4)    | 34.0 (30.4-37.0)    | 32.3 (30.6-35.2)     | 0.333   |
| Prothrombin time, s                      | 10.20-14.30  | 12.1 (11.4-12.6)    | 12.3 (11.8-12.5)    | 12.2 (11.3-12.8)    | 11.8 (11.4-12.1)     | 0.984   |
| D-dimer, µg/L                            | 0.00-0.55    | 0.24 (0.17-0.53)    | 0.23 (0.17-0.28)    | 0.23 (0.18-0.47)    | 0.61 (0.31-2.72)     | 0.032   |
| <b>Blood biochemistry</b>                |              |                     |                     |                     |                      |         |
| Albumin, g/L                             | 35.0-55.0    | 40.0 (36.0-43.0)    | 41.0 (38.3-43.0)    | 41.0 (36.5-43.0)    | 36.0 (34.0-40.0)     | 0.005   |
| Alanine aminotransferase, U/L            | 5.0-40.0     | 26.5 (15.0-43.8)    | 26.5 (14.3-43.8)    | 26.0 (17.5-34.5)    | 31.0 (15.0-69.0)     | 0.4     |
| Aspartate aminotransferase, U/L          | 8.0-40.0     | 27.0 (22.0-48.0)    | 27.0 (21.8-33.3)    | 24.5 (23.3-30.0)    | 38.0 (22.0-70.0)     | 0.578   |
| Total bilirubin, µmol/L                  | 3.40-20.50   | 10.85 (8.53-16.15)  | 10.15 (7.00-14.68)  | 12.00 (9.10-17.25)  | 10.70 (9.20-13.10)   | 0.437   |
| Serum creatinine, µmol/L                 | 62.0-115.0   | 79.5 (69.0-85.8)    | 76.0 (69.0-85.8)    | 84.0 (72.0-88.5)    | 79.0 (69.0- 82.0)    | 0.707   |
| Lactate dehydrogenase, U/L               | 109.0-245.0  | 212.0 (190.0-257.0) | 212.5 (198.5-242.3) | 194.5 (165.0-242.3) | 305.0 (209.0-418.0)  | 0.028   |
| Interleukin-6, pg/mL                     | 0.0-7.0      | 11.5 (5.6-24.0)     | 7.5 (5.4-11.6)      | 12.5 (5.8-23.6)     | 21.4 (8.1-46.7)      | 0.096   |
| C-reactive protein, mg/L                 | 0.068-8.200  | 8.91 (4.20-27.76)   | 7.05 (1.58-9.68)    | 8.50 (4.55-19.00)   | 36.70 (17.76-46.28)  | 0.0005  |
| Procalcitonin, ng/mL                     | 0.0-0.5      | 0.046 (0.037-0.065) | 0.039 (0.034-0.047) | 0.051 (0.039-0.063) | 0.065 (0.044-0.095)  | 0.017   |
| Erythrocyte sedimentation rate, mm/h     | 0.0-15.0     | 14.0 (7.8-38.3)     | 8.0 (5.0-13.0)      | 25.0 (8.0-39.5)     | 39.5 (18.0-67.8)     | 0.001   |
| Serum ferritin, ng/mL                    | 30.0-400.0   | 379.4 (212.8-556.1) | 180.4 (41.7-331.0)  | 418.8 (335.7-449.7) | 738.1 (425.2-1502.8) | 0.0001  |
| Lactic acid, mmol/L                      | 0.6-2.2      | 1.81 (1.52-2.36)    | 1.85 (1.54-2.16)    | 1.62 (1.42-1.93)    | 2.55 (1.67-3.36)     | 0.118   |
| LDLC, mmol/L                             | 2.1-3.1      | 2.5 (1.9-3.0)       | 2.5 (1.7-3.2)       | 2.3 (1.9-2.6)       | 3.0 (2.8-3.0)        | 0.460   |
| HDLC, mmol/L                             | 1.16-1.42    | 0.81 (0.77-1.09)    | 1.05 (0.80-1.17)    | 0.77 (0.76-0.94)    | 0.90 (0.83-0.91)     | 0.804   |
| cholesterol, mmol/L                      | 2.8-5.2      | 3.5 (2.8-4.2)       | 3.5 (2.7-3.5)       | 3.2 (2.7-3.6)       | 4.5 (4.0-4.8)        | 0.600   |
| glucose, mmol/L                          | 3.9-6.1      | 5.3 (4.6-7.4)       | 4.9 (4.6-5.3)       | 5.3 (4.5-5.7)       | 8.8 (8.3-9.9)        | 0.007   |
| triglyceride, mmol/L                     | 0.56-1.7     | 1.24 (0.82-1.74)    | 1.51 (1.23-1.84)    | 0.78 (0.71-1.07)    | 1.64 (1.40-1.73)     | 0.927   |
| apolipoprotein A1, g/L                   | 1.05-1.75    | 0.94 (0.73-1.05)    | 1.03 (0.95-1.10)    | 0.87 (0.75-1.00)    | 0.70 (0.60-0.96)     | 0.075   |
| apolipoprotein B, g/L                    | 0.6-1.4      | 0.71 (0.56-0.85)    | 0.79 (0.58-0.86)    | 0.64 (0.55-0.73)    | 0.71 (0.65-0.84)     | 0.293   |
| lipoprotein, mg/L                        | 0-300        | 73 (31-134)         | 41 (21-111)         | 64 (46-161)         | 104 (43-134)         | 0.976   |

LDLC: low density lipoprotein cholesterol, HDLC: high density lipoprotein cholesterol.

**Table S2. Baseline characteristics of healthy controls and COVID-19 patients, Related to Experimental Model and Subject Details (Study Participants and Data Collection).**

Data are median (IQR). P values comparing between controls, mild, moderate and severe patients were computed using One-way ANOVA for age and BMI, and the chi-square test for sex. COVID-19: coronavirus disease 2019.

| <b>Baseline characteristics of study cohort</b> |                     |                     |                     |                     |          |
|-------------------------------------------------|---------------------|---------------------|---------------------|---------------------|----------|
|                                                 | Control<br>(n=26)   | Mild<br>(n=18)      | Moderate<br>(n=19)  | Severe<br>(n=13)    | <i>p</i> |
| Age, years                                      | 30 (29-35)          | 32.0 (22.3-40.0)    | 45.0 (38.0-53.5)    | 50.0 (40.0-78.0)    | <0.001   |
| Sex                                             |                     |                     |                     |                     | 0.525    |
| Men                                             | 15 (58%)            | 9 (50%)             | 12 (63%)            | 9 (69%)             |          |
| Women                                           | 11 (42%)            | 9 (50%)             | 7 (37%)             | 4 (31%)             |          |
| BMI                                             | 21.25 (19.68-24.00) | 25.75 (23.25-27.27) | 24.62 (23.35-26.60) | 25.99 (24.32-26.89) | 0.013    |



**Table S3. Summary of treatments prescribed to COVID-19 patients prior to blood collection, Related to**

**Table 1.**

| <b>Treatment of COVID-19 patients before sampling</b> |                                 |                         |                             |                           |
|-------------------------------------------------------|---------------------------------|-------------------------|-----------------------------|---------------------------|
|                                                       | <b>All patients<br/>(n =50)</b> | <b>Mild<br/>(n =18)</b> | <b>Moderate<br/>(n =19)</b> | <b>Severe<br/>(n =13)</b> |
| Kaletra                                               | 33/50 (66%)                     | 10/18 (55.56%)          | 16/19 (84.21%)              | 7/13 (53.85%)             |
| Arbidol                                               | 5/50 (10%)                      | 0/18 (0%)               | 2/19 (10.53%)               | 3/13 (23.08%)             |
| Interferon therapy                                    | 40/50 (80%)                     | 14/18 (77.78%)          | 17/19 (89.47%)              | 9/13 (69.23%)             |
| Antibiotic therapy                                    | 17/50 (34%)                     | 0/18 (0%)               | 5/19 (26.32%)               | 12/13 (92.31%)            |
| Glucocorticoid                                        | 12/50 (24%)                     | 0/18 (0%)               | 4/19 (21.05%)               | 8/13 (61.54%)             |
| Mechanical ventilation                                | 2/50 (4%)                       | 0/18 (0%)               | 0/19 (0%)                   | 2/13 (15.38%)             |
